# Supplementary material
Source: PubMed Central journal article supplement (PMC3770723)
Supplement: NIHMS512803-supplement-S__Fig__1.pdf [file NIHMS512803-supplement-S__Fig__1.pdf]

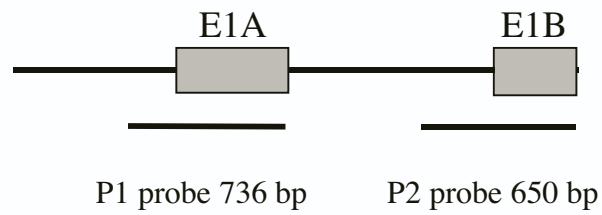

**A**

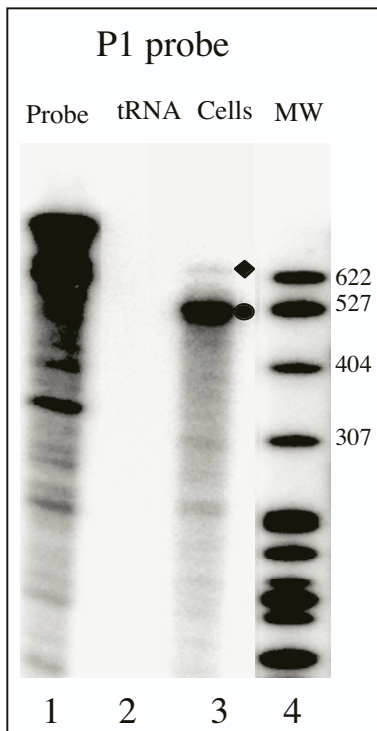

◆  $\overrightarrow{\text{GATCACATGGTACC}}$  (about 629 bp length)

●  $\overrightarrow{\text{AGAGTGAAATATTA}}$  (about 519 bp length)

**B**

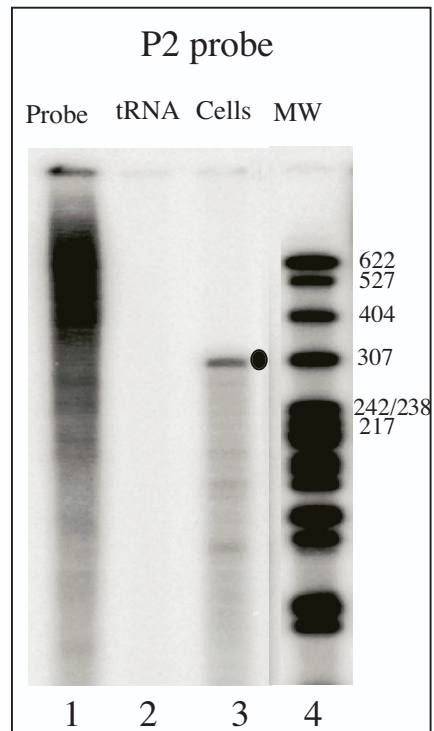

●  $\overrightarrow{\text{CTTCTGTGAATACCG}}$  (about 307bp length)
