# Supplementary material
Source: PubMed Central journal article supplement (PMC3770723)
Supplement: NIHMS512803-supplement-S__Fig__2.pdf [file NIHMS512803-supplement-S__Fig__2.pdf]

**A**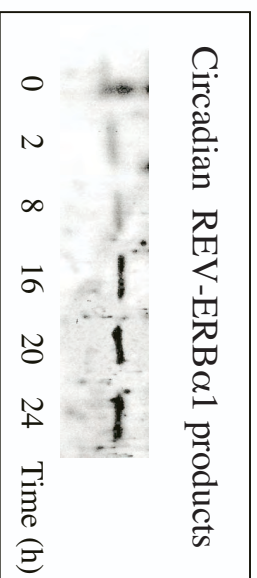**B**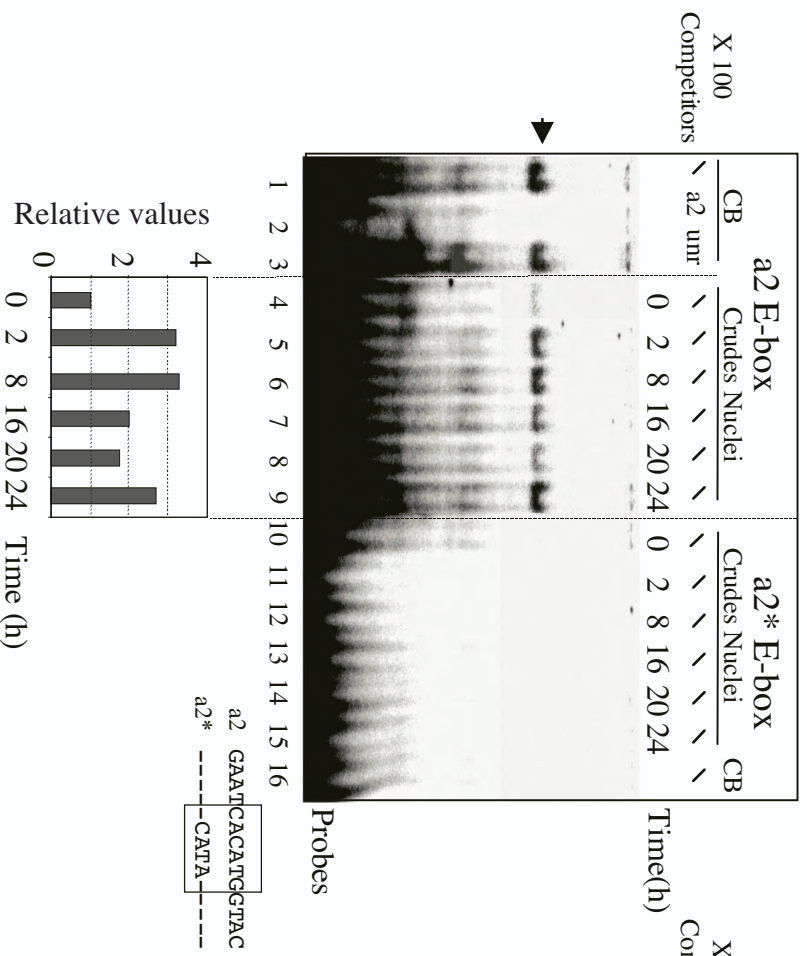

Circadian CLOCK/BMAL1 binding on A2 site

**C**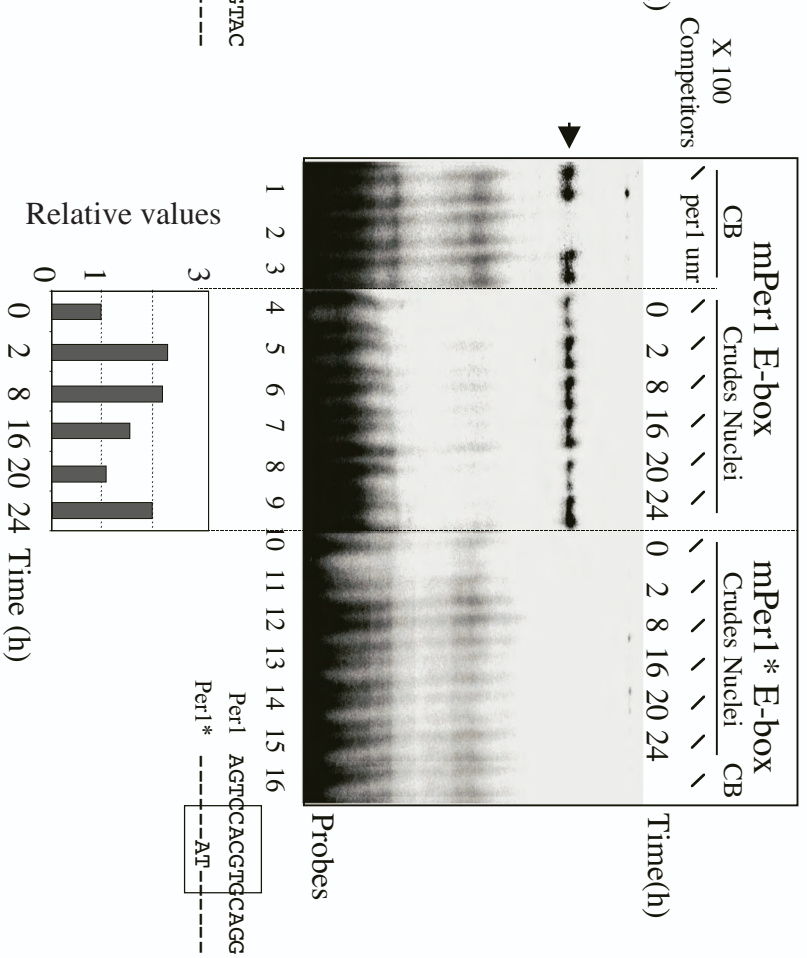

Circadian CLOCK/BMAL1 binding on Per1 site

Triqueneaux et al., supplementary Figure 2
