# Supplementary material
Source: PubMed Central journal article supplement (PMC3770723)

A

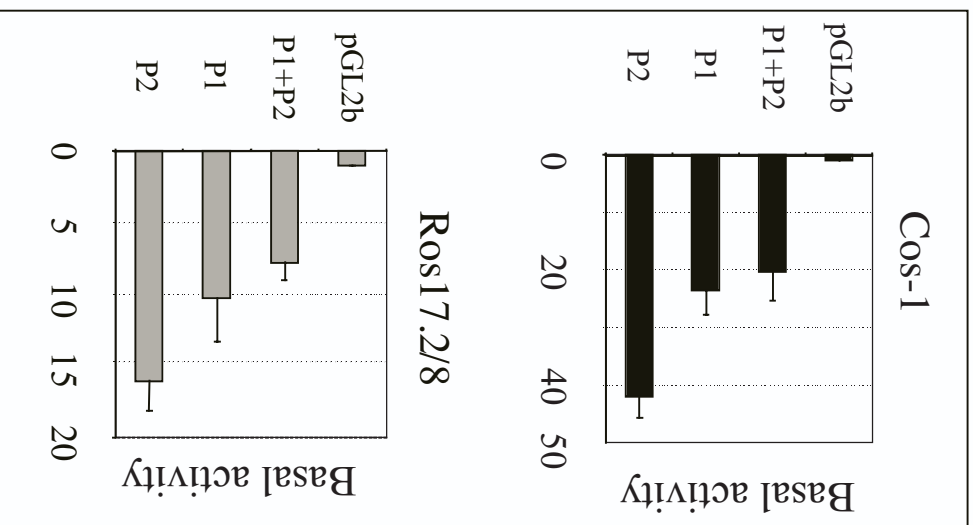

B

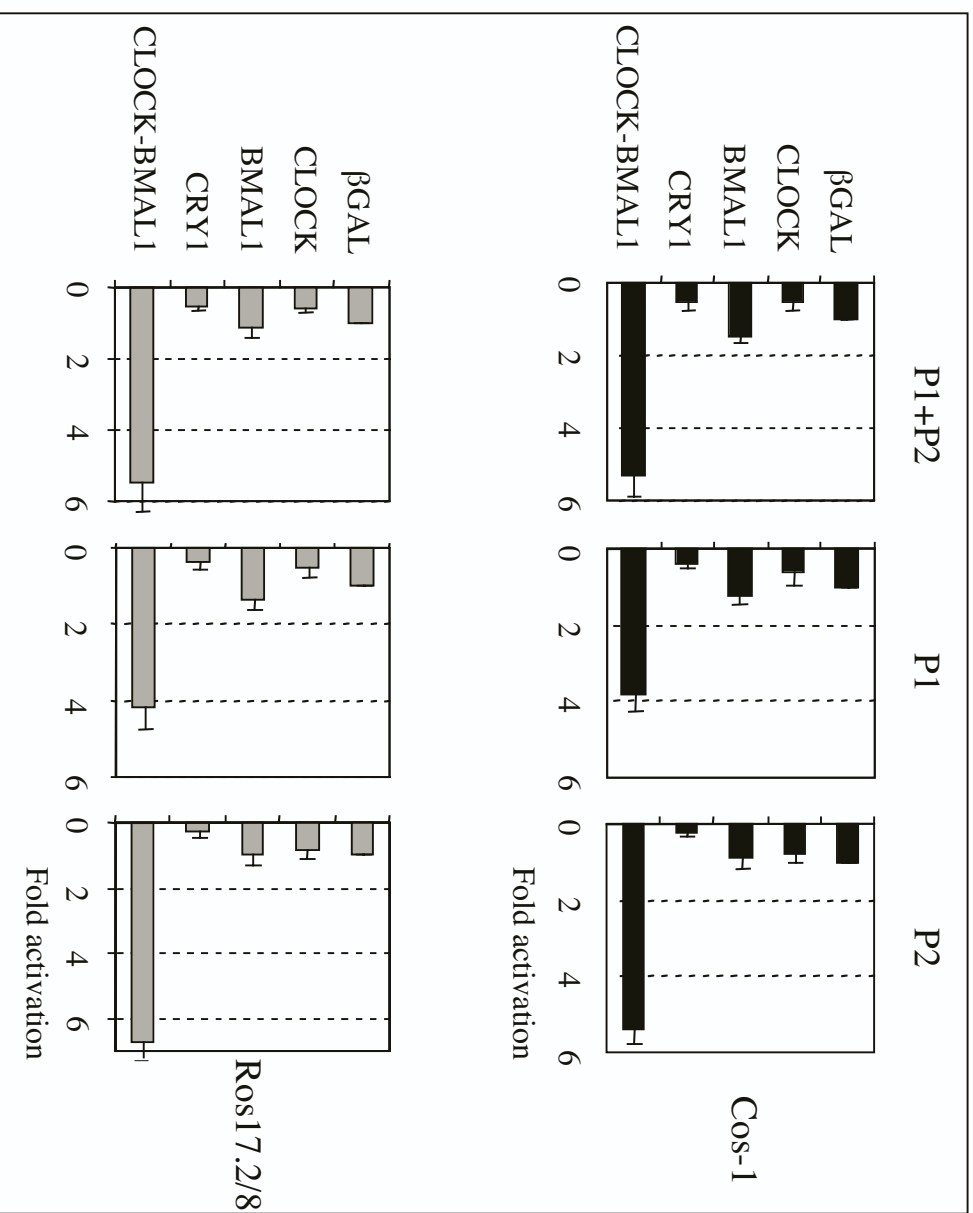

Triqueneaux et al., supplementary Figure 3

Supplement: NIHMS512803-supplement-S__Fig__3.pdf [file NIHMS512803-supplement-S__Fig__3.pdf]
